# Supplementary material for: Increased Sulfiredoxin Expression in Gastric Cancer Cells May Be a Molecular Target of the Anticancer Component Diallyl Trisulfide
Source: Hindawi journal article supplement (doi:10.1155/2019/4636804), 2019-02-04
Supplement: f1 [file 4636804.f1.pdf]

Supplementary Material

Table S1. Correlation between Srx expression and clinical pathological features in gastric cancer.

| Characteristics     | n  | Srx      |          | <i>p</i> value |
|---------------------|----|----------|----------|----------------|
|                     |    | positive | negative |                |
| Age                 | 47 |          |          |                |
| 19-59 years         | 14 | 13       | 1        | 0.657          |
| 60- 87 years        | 33 | 27       | 6        |                |
| Sex                 |    |          |          |                |
| Female              | 15 | 13       | 2        | 1              |
| Male                | 32 | 27       | 5        |                |
| Differentiation     |    |          |          |                |
| Poor                | 37 | 32       | 5        | 1              |
| Well                | 10 | 8        | 2        |                |
| Lymph node invasion |    |          |          |                |
| Negative            | 17 | 15       | 2        | 1              |
| Positive            | 30 | 25       | 5        |                |
| TNM staging         |    |          |          |                |
| I                   | 8  | 6        | 2        | 0.303          |
| II                  | 11 | 10       | 1        |                |
| III                 | 19 | 15       | 4        |                |
| IV                  | 7  | 7        | 0        |                |

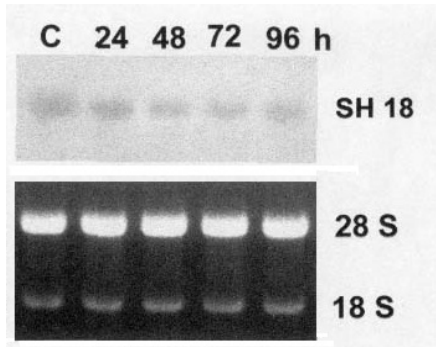

Figure S1. Northern blot of SH18.
